# Supplementary material for: The Association of MEG3 lncRNA with Nuclear Speckles in Living Cells
Source: Cells. 2022 Jun 16;11(12):1942. doi: 10.3390/cells11121942 (PMC9221825; doi:10.3390/cells11121942)
Supplement: Supplementary file 1 [file cells-11-01942-s001.zip]

Archive with 5 entries (5 files):
- cells-1676799-supplementary.pdf
- Movie S1.mp4
- Movie S2.mp4
- Movie S3.mp4
- Movie S4.mp4
